# Supplementary material
Source: PubMed Central journal article supplement (PMC3328615)
Supplement: NIHMS290269-supplement-supplement_1.pdf [file NIHMS290269-supplement-supplement_1.pdf]

Supplementary Table 1

Predictors of models displayed in Fig. 3. Predictors of the 24 highest ranked models including 1 to 4 predictors are listed. Models were ranked according to their classification accuracy across bootstrapping trials for the prediction of MCI conversion and are identified by their corresponding rank in Fig. 3. digit span, total score of Wechsler's digit span forward and backward test; LHC, left hippocampus; TMT-B, trail making test B

| Rank | Single predictor                    | 2-predictor model                            | 3-predictor model                                  | 4-predictor model                                                             |
|------|-------------------------------------|----------------------------------------------|----------------------------------------------------|-------------------------------------------------------------------------------|
| 1    | RERC                                | LHC<br>digit span                            | LHC<br>LR <sub>TAA</sub><br>digit span             | RHC<br>CSF P-tau <sub>181</sub><br>TMT-B<br>age                               |
| 2    | RHC                                 | RHC<br>digit span                            | LHC<br>CSF P-tau <sub>181</sub><br>digit span      | LHC<br>CSF P-tau/A $\beta$ <sub>1-42</sub><br>LR <sub>TAA</sub><br>digit span |
| 3    | TMT-B                               | RHC<br>TMT-B                                 | LHC<br>ApoE<br>digit span                          | RHC<br>CSF P-tau <sub>181</sub><br>CSF P-tau/A $\beta$ <sub>1-42</sub><br>age |
| 4    | LHC                                 | LHC<br>AVLT recog.                           | RERC<br>digit span<br>age                          | RHC<br>ApoE<br>digit span<br>age                                              |
| 5    | CSF P-tau <sub>181</sub>            | RERC<br>TMT-B                                | RHC<br>TMT-B<br>age                                | RERC<br>TMT-B<br>age<br>gender                                                |
| 6    | AVLT-IM REC                         | AVLT-DEL REC<br>TMT-B                        | LHC<br>TMT-A<br>digit span                         | LHC<br>ApoE<br>digit span<br>age                                              |
| 7    | AVLT-DEL REC                        | LHC<br>TMT-B                                 | LHC<br>digit span<br>BNT                           | LHC<br>ApoE<br>AVLT-IM REC<br>TMT-A                                           |
| 8    | Cat fluency (veg)                   | RERC<br>digit span                           | LHC<br>CSF A $\beta$ <sub>1-42</sub><br>digit span | RHC<br>ApoE<br>AVLT recog.<br>TMT-B                                           |
| 9    | Digit score                         | RHC<br>AVLT-IM REC                           | RERC<br>LHC<br>digit span                          | RHC<br>AVLT recog.<br>TMT-B<br>age                                            |
| 10   | CSF T-tau                           | CSF T-tau/A $\beta$ <sub>1-42</sub><br>TMT-B | LHC<br>digit span<br>age                           | RHC<br>CSF P-tau/A $\beta$ <sub>1-42</sub><br>ApoE<br>TMT-B                   |
| 11   | LERC                                | LERC<br>digit span                           | LHC<br>RHC<br>AVLT-IM REC                          | LHC<br>RHC<br>LR <sub>TAA</sub><br>digit span                                 |
| 12   | AVLT recog.                         | CSF P-tau/A $\beta$ <sub>1-42</sub><br>TMT-B | RHC<br>CSF A $\beta$ <sub>1-42</sub><br>digit span | LHC<br>CSF P-tau <sub>181</sub><br>LR <sub>TAA</sub><br>digit span            |
| 13   | APOE                                | LERC<br>cat fluency (veg)                    | RHC<br>Cat. fluency (ANI)<br>digit span            | LHC<br>LR <sub>TAA</sub><br>ApoE<br>digit span                                |
| 14   | Gender                              | LERC<br>RHC                                  | LERC<br>LR <sub>TAA</sub><br>digit span            | RHC<br>LR <sub>TAA</sub><br>TMT-B<br>digit span                               |
| 15   | CSF T-tau/A $\beta$ <sub>1-42</sub> | AVLT-IM REC<br>TMT-B                         | RHC<br>TMT-A<br>digit span                         | RHC<br>ApoE<br>AVLT recog.<br>TMT-B                                           |

(continued on next page)

Supplementary Table 1  
(continued)

| Rank | Single predictor                    | 2-predictor model                      | 3-predictor model                             | 4-predictor model                                                 |
|------|-------------------------------------|----------------------------------------|-----------------------------------------------|-------------------------------------------------------------------|
| 16   | TMT-A                               | LHC<br>CSF T-tau                       | LHC<br>digit span<br>gender                   | LHC<br>LR <sub>TAA</sub><br>TMT-A<br>digit span                   |
| 17   | CSF P-tau/A $\beta$ <sub>1-42</sub> | RERC<br>gender                         | RHC<br>TMT-B<br>digit span                    | LHC<br>RHC<br>gender<br>digit span                                |
| 18   | LR <sub>TAA</sub>                   | RHC<br>CSF A $\beta$ <sub>1-42</sub>   | RHC<br>CSF P-tau <sub>181</sub><br>digit span | RERC<br>CSF T-tau<br>TMT-B<br>gender                              |
| 19   | BNT                                 | CSF P-tau <sub>181</sub><br>digit span | RHC<br>LR <sub>TAA</sub><br>TMT-B             | LHC<br>LR <sub>TAA</sub><br>AVLT recog.<br>digit span             |
| 20   | Cat. fluency (ANI)                  | LERC<br>LHC                            | RHC<br>ApoE<br>digit span                     | LHC<br>CSF P-tau <sub>181</sub><br>TMT-B<br>age                   |
| 21   | Age                                 | RHC<br>age                             | RHC<br>CSF P-tau <sub>181</sub><br>TMT-B      | LHC<br>CSF T-tau<br>AVLT-DEL REC<br>digit span                    |
| 22   | CSF A $\beta$ <sub>1-42</sub>       | RHC<br>digit span F                    | LHC<br>RHC<br>digit span                      | LHC<br>RHC<br>ApoE<br>digit span                                  |
| 23   | Digit span B                        | RHC<br>cat fluency (veg)               | LHC<br>CSF A $\beta$ <sub>1-42</sub><br>TMT-B | LHC<br>CSF P-tau/A $\beta$ <sub>1-42</sub><br>TMT-B<br>digit span |
| 24   | Digit span F                        | RERC<br>digit span B                   | LHC<br>CSF T-tau<br>digit span                | LHC<br>CSF T-tau<br>ApoE<br>TMT-B                                 |

APOE, binary ApoE genotype ( $\epsilon$ 4-allele carriers vs  $\epsilon$ 4-allele non-carriers); AVLT-DEL REC, AVLT delayed free recall; AVLT-IM REC, AVLT immediate free recall; AVLT-DEL RECOG, AVLT recognition memory; BNT, Benton naming test; Cat Fluency (ANI), Category fluency for category of animals; Cat Fluency (VEG), Category fluency for category of vegetables; Digit span B, Digit span backwards (length); Digit span F, Digit span forward (length); Digit Score, Digit span total score; LERC, left entorhinal cortex thickness; LHC, left hippocampus volume; RERC, right entorhinal cortex thickness; LHC, left hippocampus volume; TMT-A, Trail Making Test A; TMT-B, Train Making Test B.
